# Supplementary material for: The effects of asymmetric bent-shaped compounds on the temperature range and electro-optical performances of liquid crystalline blue phases
Source: Royal Society of Chemistry journal article supplement (doi:10.1039/c6ra22704j), 2016-01-01
Supplement: c6ra22704j1.pdf [file c6ra22704j1.pdf]

## Electronic Supplementary Information

### The effects of asymmetric bent-shaped compounds on the temperature range and electro-optical performances of liquid crystalline blue phases

Xin Wang<sup>a</sup>, Wan-Li He<sup>a</sup>, Zhou Yang<sup>a</sup>, Dong Wang<sup>a</sup>, Hui Cao<sup>a</sup>, Zhi-Gang Zheng<sup>b</sup>, Zhen Liu<sup>b</sup>, Xiang Liu<sup>a</sup>

<sup>a</sup>Department of Materials Physics and Chemistry, School of Materials Science and Engineering, University of Science and Technology Beijing, Beijing 100083, P.R. China, E-mail: hewanli@mater.ustb.edu.cn

<sup>b</sup>Department of Physics, East China University of Science and Technology, Shanghai 200237, China

Figure S1 is the <sup>1</sup>H NMR of CN-OXD-C5H.

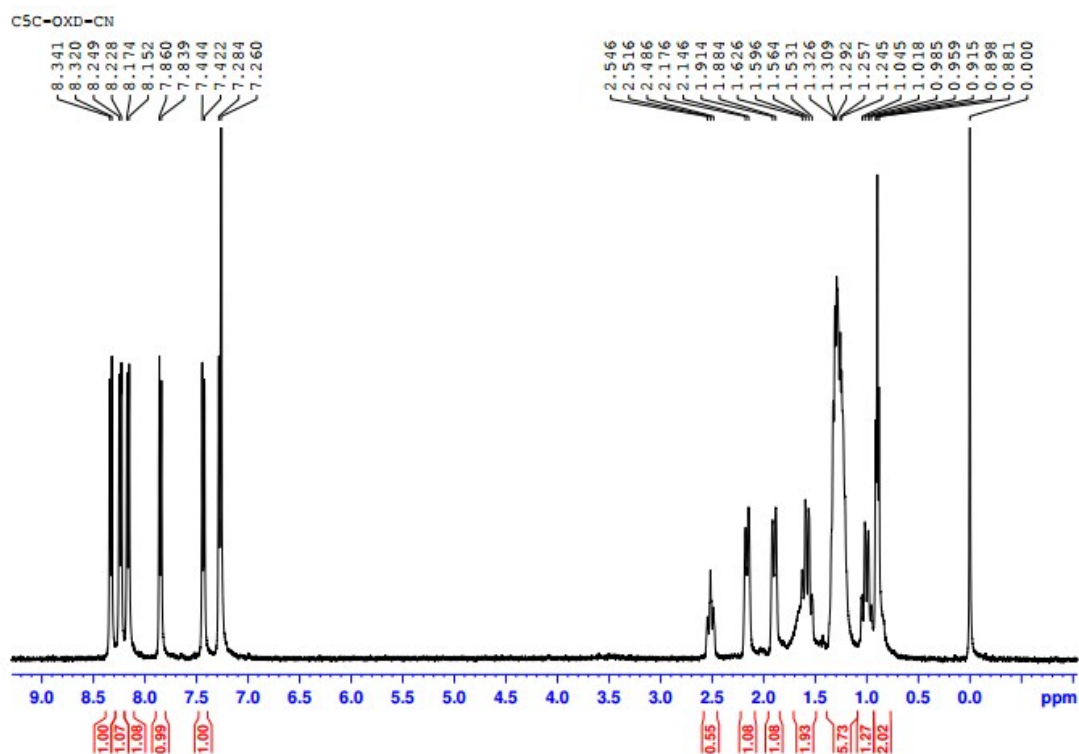

Figure S1. The spectrum of <sup>1</sup>H NMR of CN-OXD-C5H

Figure S2 is the Mass Spectrometry of CN-OXD-C5H.

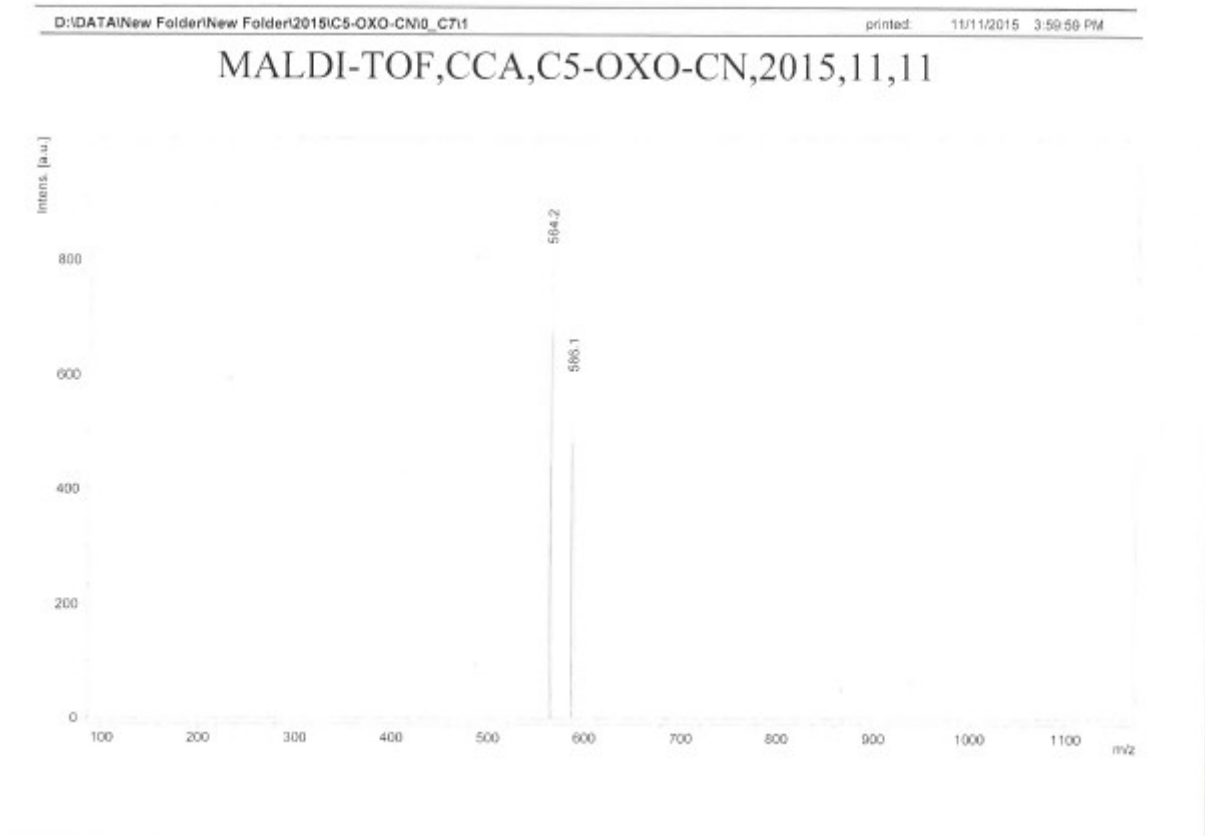

Figure S2. The Mass Spectrometry of CN-OXD-C5H

Figure S3 is the  $^1\text{H}$  NMR of C5H-OXD-C5H.

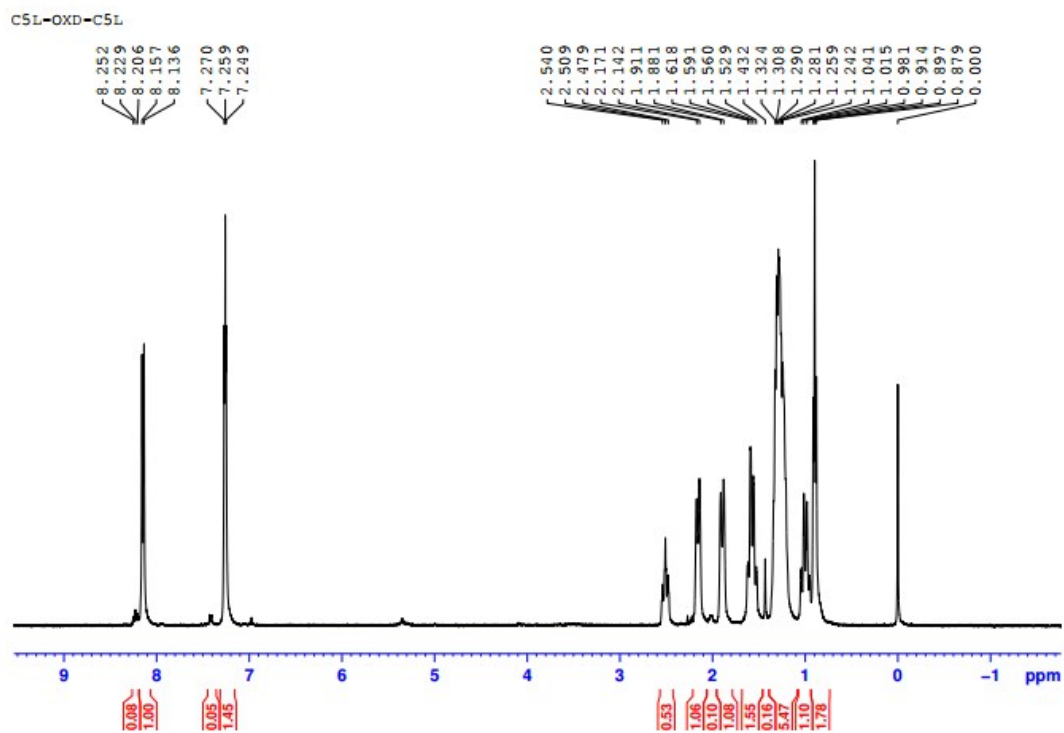

Figure S3. The spectrum of  $^1\text{H}$  NMR of C5H-OXD-C5H

Figure S4 is the Mass Spectrometry of C5H-OXD-C5H.

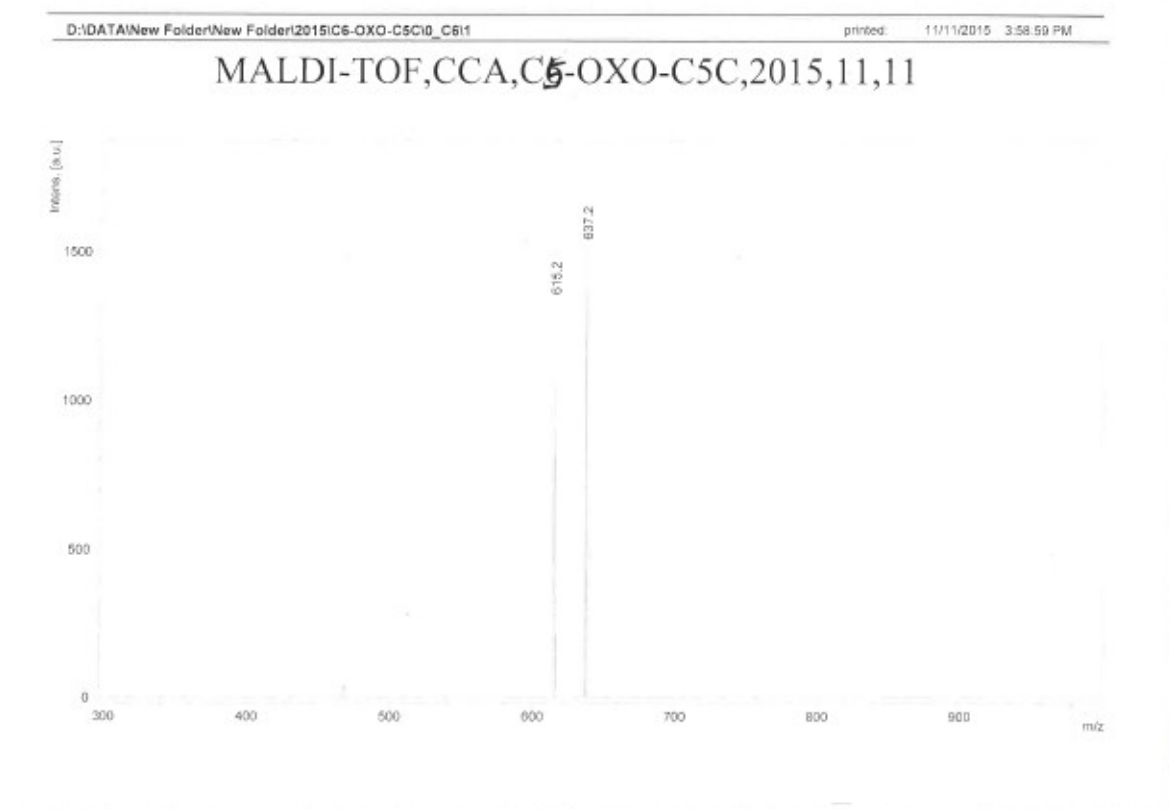

Figure S4. The Mass Spectrometry of C5H-OXD-C5H

Figure S5 is the  $^1\text{H}$  NMR of CN-OXD-C6H.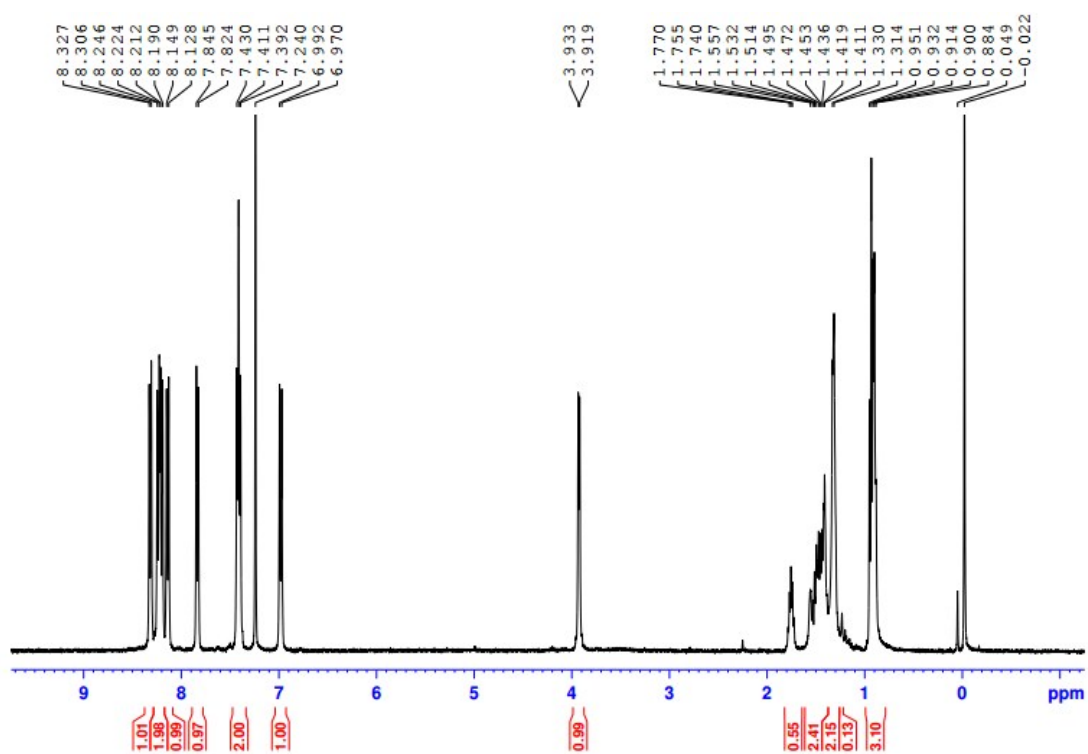Figure S5. The spectrum of  $^1\text{H}$  NMR of CN-OXD-C6H

Figure S6 is the Mass Spectrometry of CN-OXD-C6H.

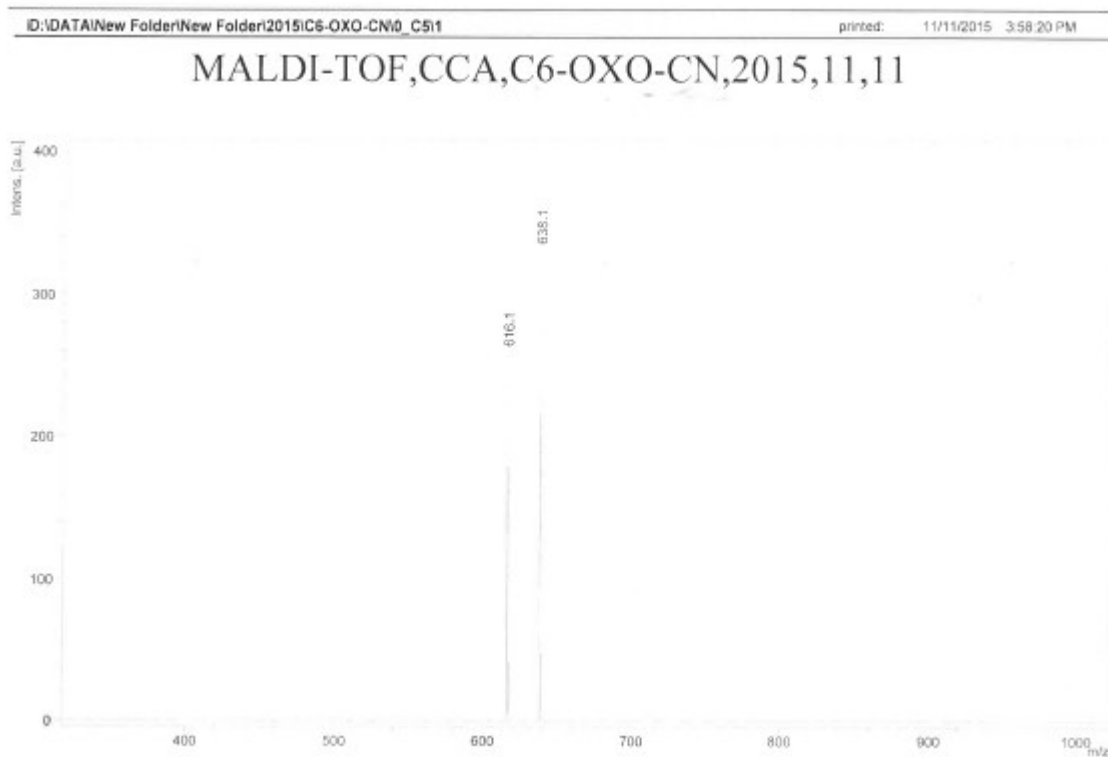

Figure S6. The Mass Spectrometry of CN-OXD-C6H

Figure S7 is the  $^1\text{H}$  NMR of C6H-OXD-C6H.

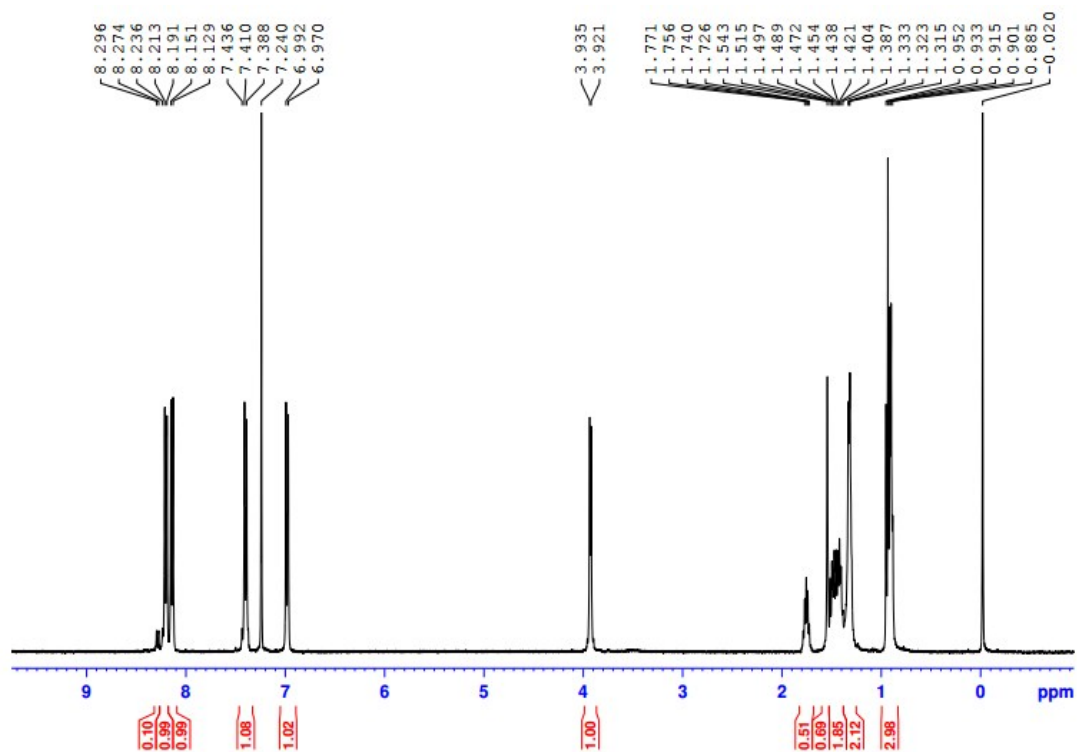

Figure S7. The spectrum of  $^1\text{H}$  NMR of C6H-OXD-C6H

Figure S8 is the Mass Spectrometry of C6H-OXD-C5H.

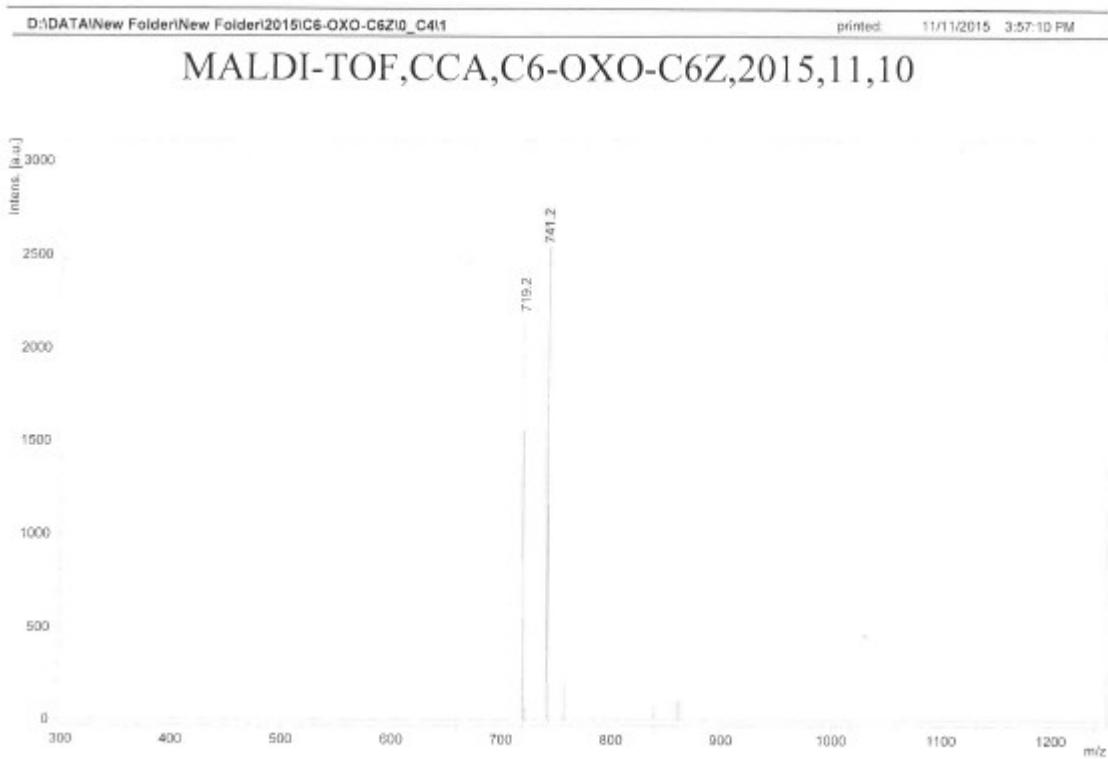

Figure S8. The Mass Spectrometry of C6H-OXD-C6H

Figure S9 is the  $^1\text{H}$  NMR of CN-OXD-C6HF.

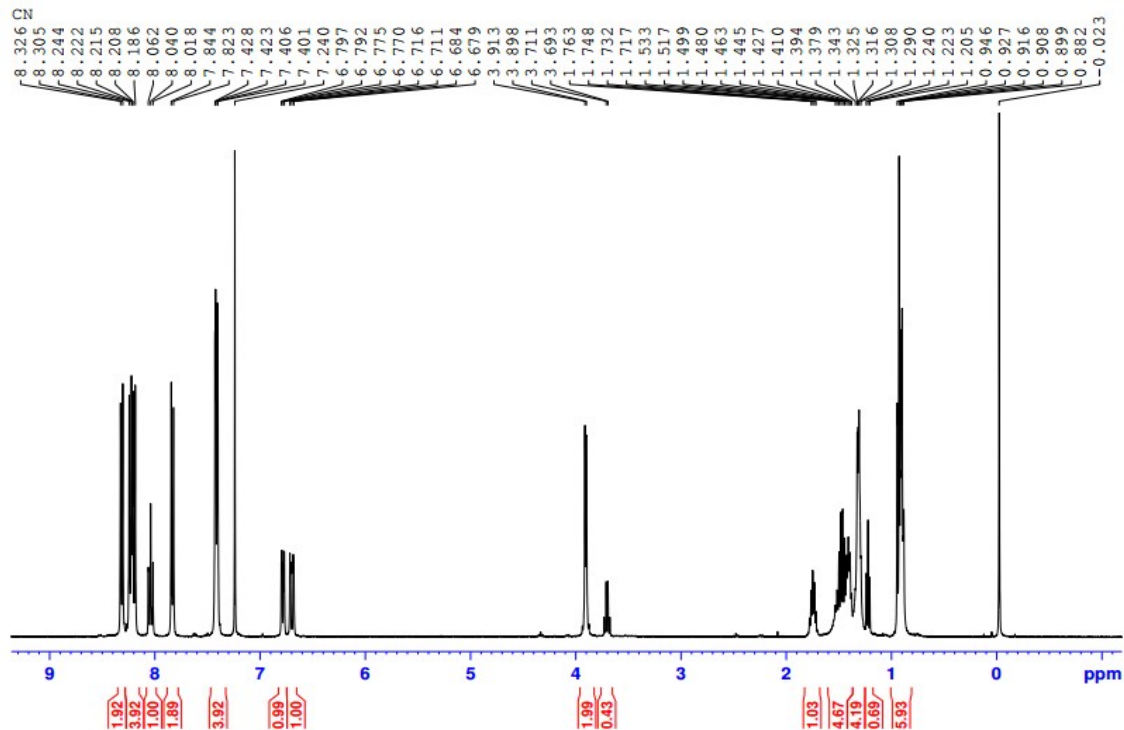

Figure S9. The spectrum of  $^1\text{H}$  NMR of CN-OXD-C6HF

Figure S10 is the Mass Spectrometry of CN-OXD-C6HF.

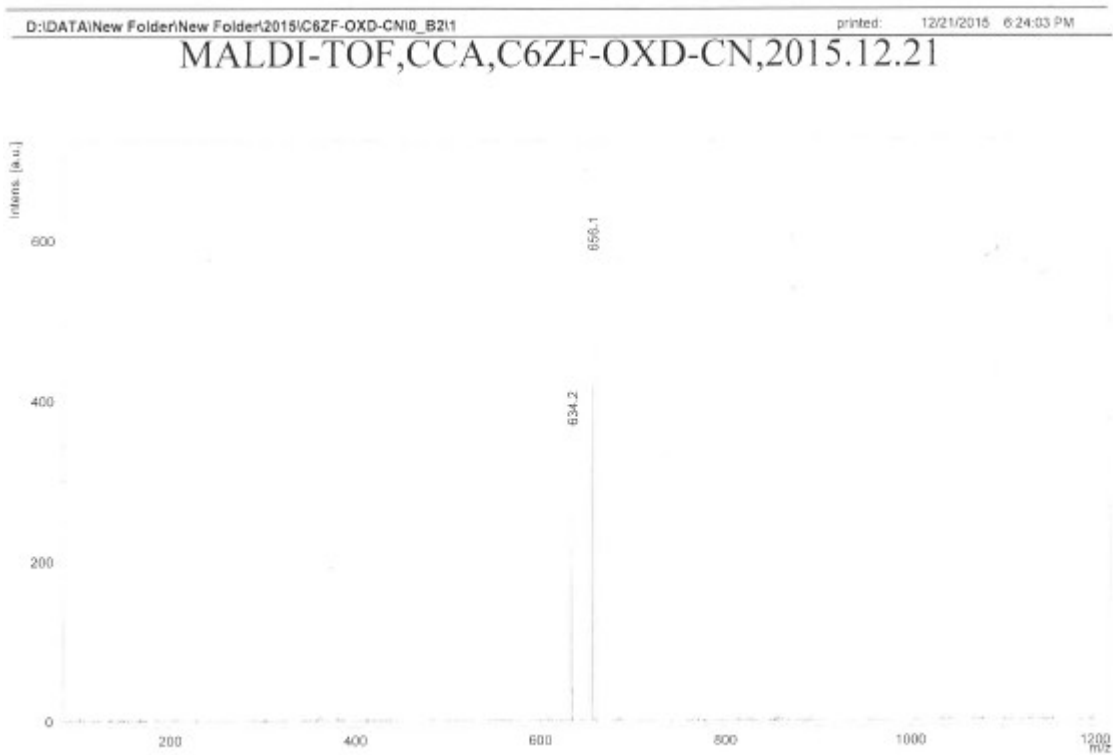

Figure S10. The Mass Spectrometry of CN-OXD-C6HF

Figure S11 is the  $^1\text{H}$  NMR of C6HF-OXD-C6HF.

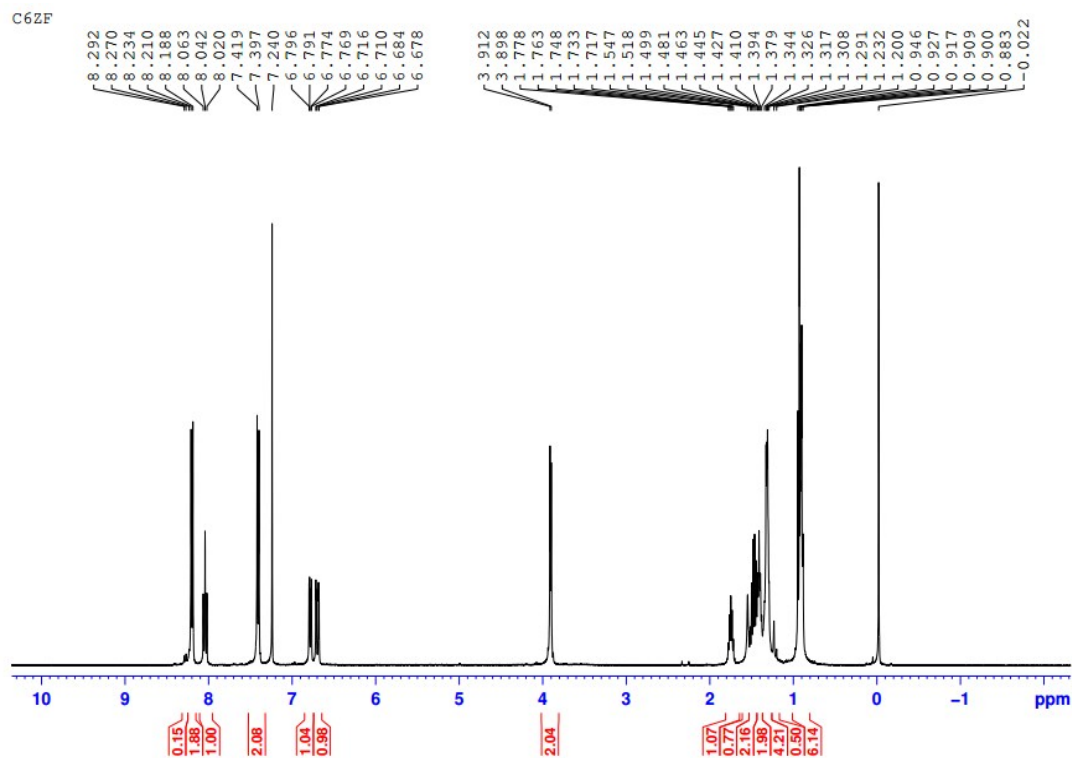

Figure S11. The spectrum of  $^1\text{H}$  NMR of C6HF-OXD-C6HF

Figure S12 is the Mass Spectrometry of C6HF-OXD-C6HF.

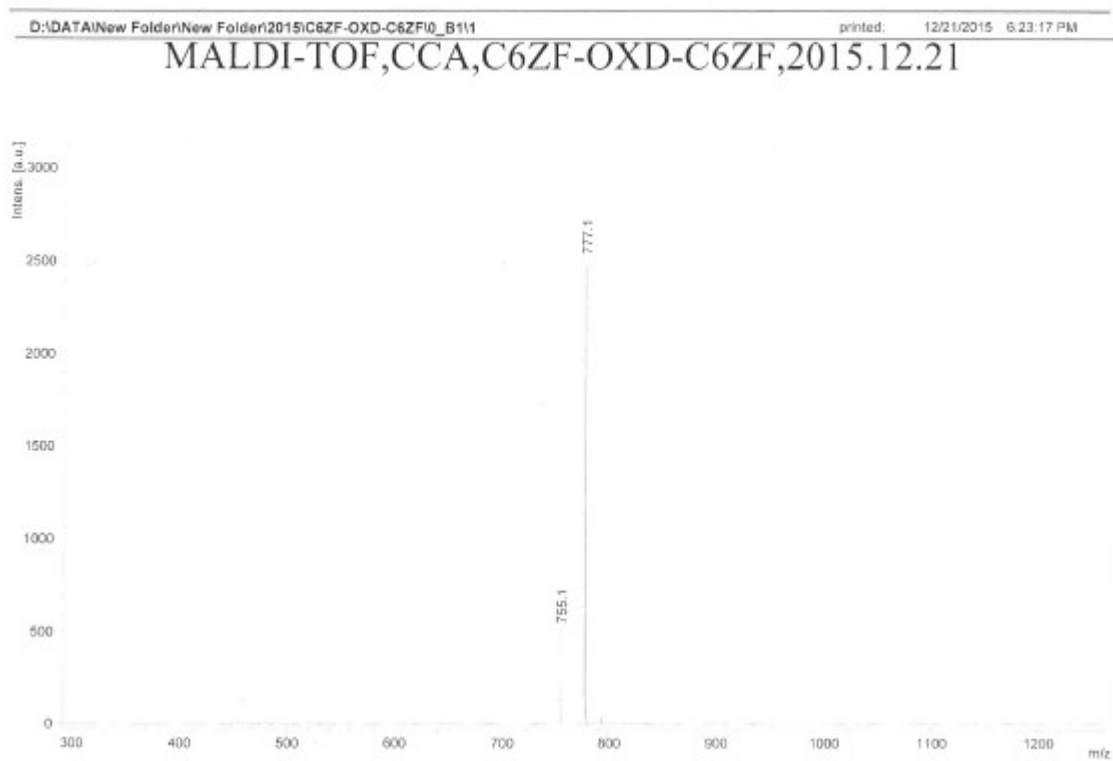

Figure S12. The Mass Spectrometry of C6HF-OXD-C6HF



Figure S13 is the  $^1\text{H}$  NMR of CN-Th-C6H.

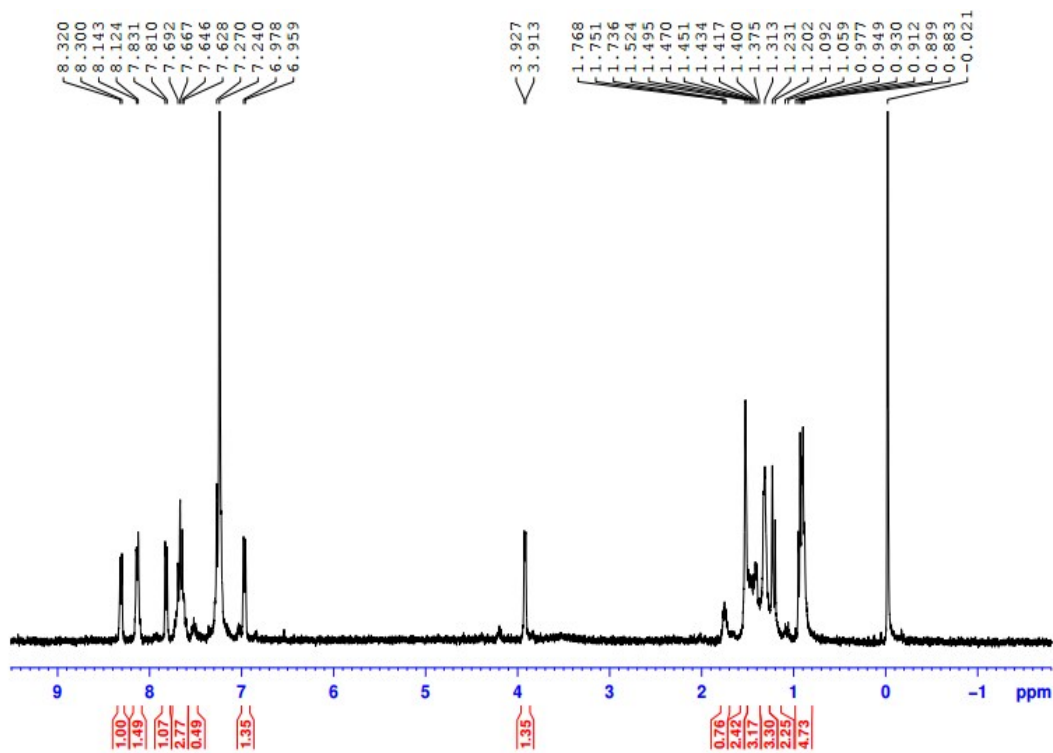

Figure S13. The spectrum of  $^1\text{H}$  NMR of CN-Th-C6H

Figure S14 is the Mass Spectrometry of CN-OXD-C6H.

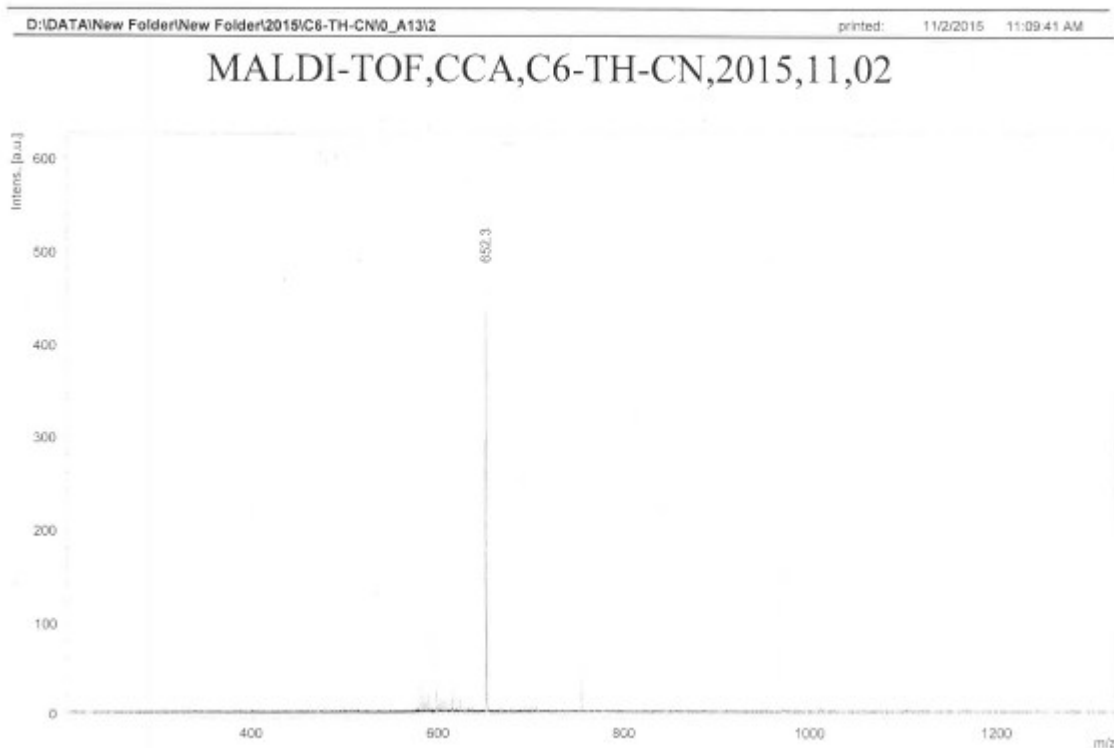

Figure S14. The Mass Spectrometry of CN-Th-C6H

Figure S15 is the  $^1\text{H}$  NMR of C6H-Th-C6H.

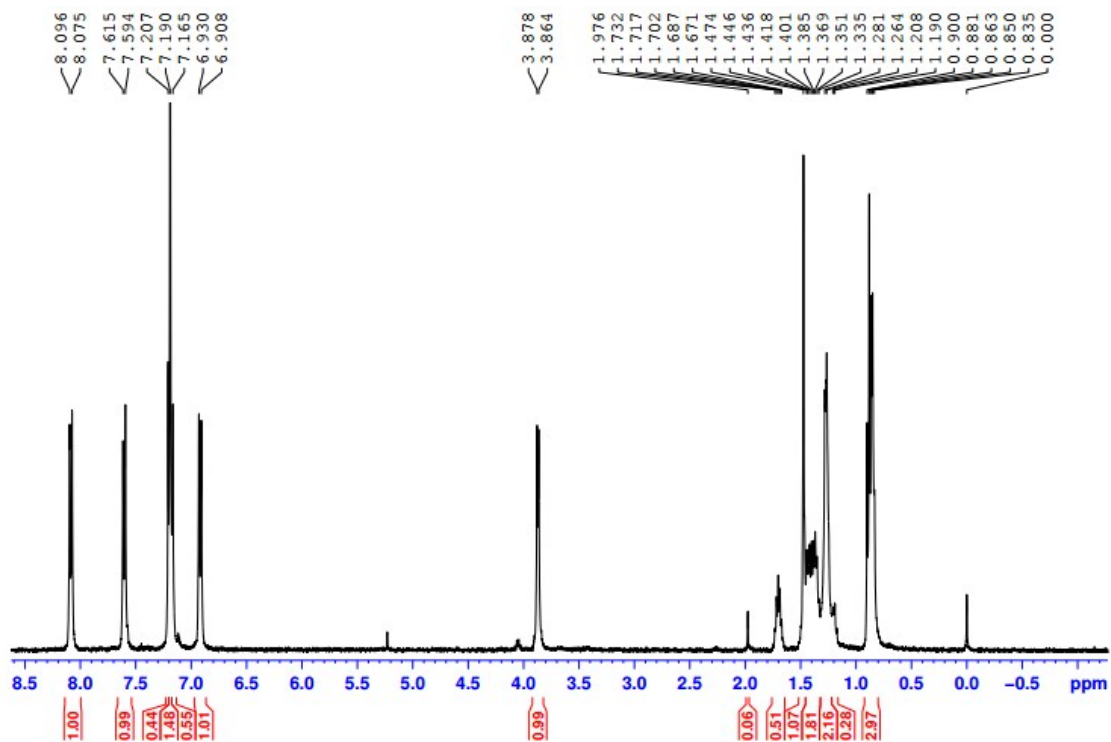Figure S15. The spectrum of  $^1\text{H}$  NMR of C6H-Th-C6H

Figure S2 is the Mass Spectrometry of C6H-Th-C6H.

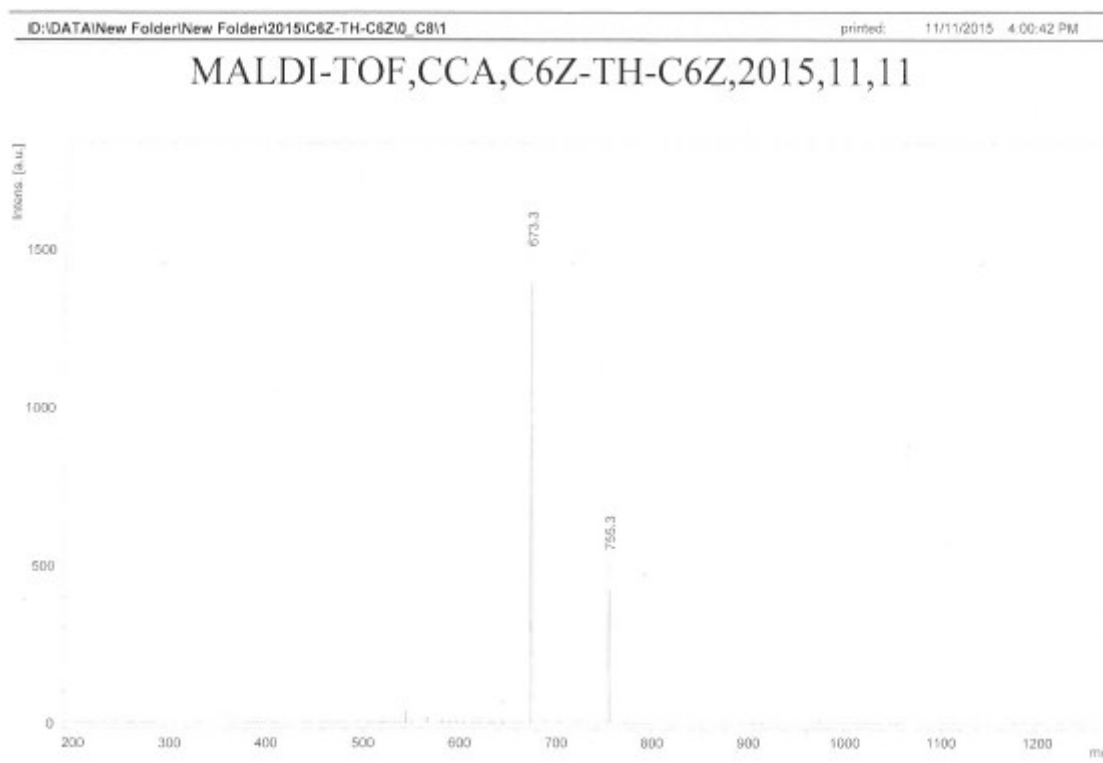

Figure S16. The Mass Spectrometry of C6H-Th-C6H

Figure S17 is the normalized voltage-transmittance curve of BPI in the N\*LC doped with different bent-shaped compounds, and all the concentration is 15%.

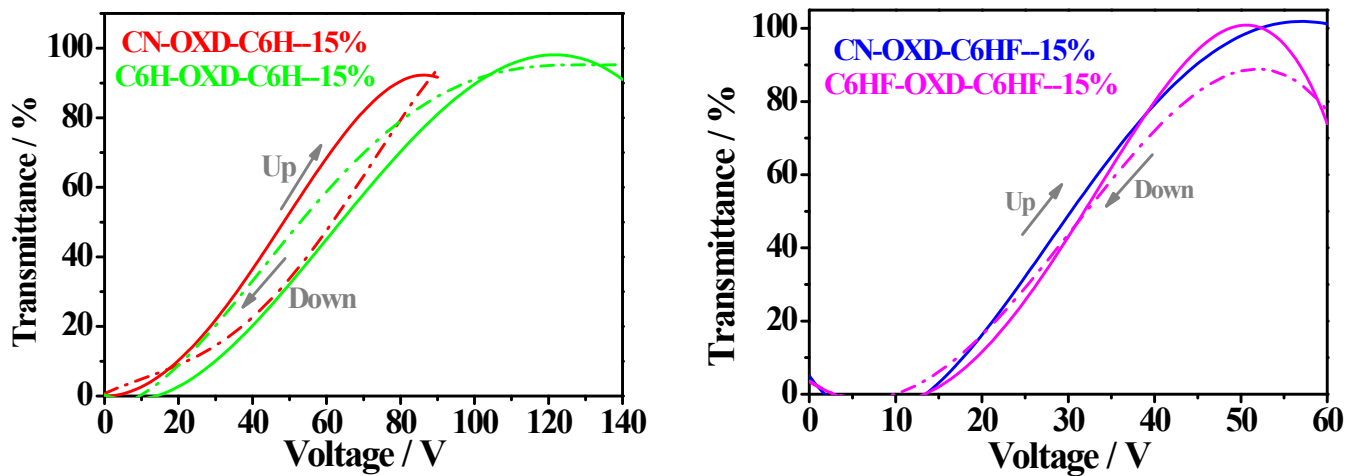

Figure S17. Normalized voltage-transmittance curve of BPI in the N\*LC doped with different bent-shaped compounds and all the concentration is 15%.
